# Supplementary material for: Distribution and kinetics of the Kv1.3-blocking peptide HsTX1[R14A] in experimental rats
Source: PubMed Central journal article supplement (PMC5473807; doi:10.1038/s41598-017-03998-x), 2017-06-16
Supplement: 41598_2017_3998_MOESM1_ESM.pdf [file 41598_2017_3998_MOESM1_ESM.pdf]

# SUPPLEMENTARY INFORMATION

## Distribution and kinetics of the Kv1.3-blocking peptide HsTX1[R14A] in experimental rats

Ralf Bergmann<sup>1</sup>, Manja Kubeil<sup>1,2</sup>, Kristof Zarschler<sup>1</sup>, Sandeep Chhabra<sup>3</sup>, Rajeev B. Tajhya<sup>4</sup>, Christine Beeton<sup>4</sup>, Michael W. Pennington<sup>5</sup>, Michael Bachmann<sup>1</sup>, Raymond S. Norton<sup>3</sup>, Holger Stephan<sup>1</sup>

<sup>1</sup> *Helmholtz-Zentrum Dresden - Rossendorf, Institute of Radiopharmaceutical Cancer Research, Dresden, D-01328, Germany*

<sup>2</sup> *School of Chemistry, Monash University, Melbourne, Victoria 3800 Australia*

<sup>3</sup> *Medicinal Chemistry, Monash Institute of Pharmaceutical Sciences, Monash University, Parkville, Victoria 3052 Australia*

<sup>4</sup> *Department of Molecular Physiology and Biophysics, Baylor College of Medicine, Houston, TX 77030, U.S.A.*

<sup>5</sup> *Peptides International, Louisville, KY 40299, U.S.A.*

Correspondence and requests for materials should be addressed to H.S. (h.stephan@hzdr.de) or R.S.N. (ray.norton@monash.edu)

## Supplementary Figures

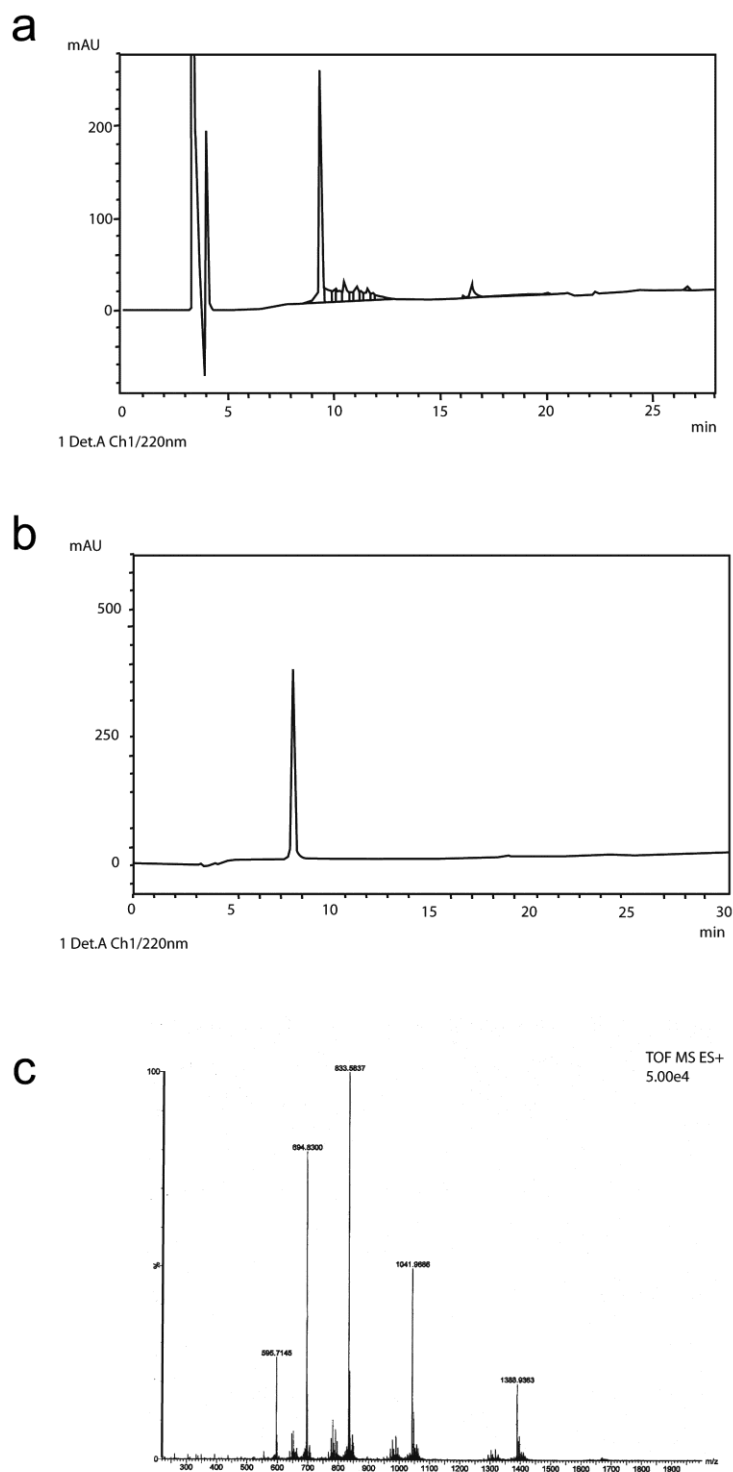

**Figure S1.** (a) Crude HPLC profile of NOTA-HsTX1[R14A] after 18 h folding according to the Materials and Methods. Gradient conditions are 10-70% B over 30 min at 1 mL/min. Absorbance measured at 220 nm. (b) Purified NOTA-HsTX1[R14A] using gradient of 5-45% B over 30 min. (c) ESI-MS demonstrating multi-charged ions for the purified, oxidised NOTA-HsTX1[R14A].

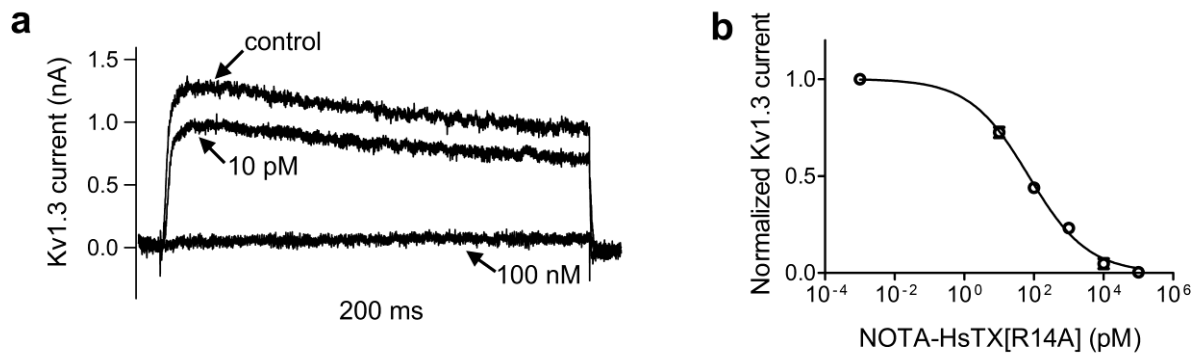

**Figure S2.** Functional analyses of NOTA-HsTX1[R14A]. (a) Whole-cell Kv1.3 currents measured by whole-cell patch-clamp in stably transfected L929 fibroblasts before (control) and after perfusion of 10 pM and 100 nM NOTA-HsTX1[R14A]. (b) Dose-response inhibition of Kv1.3 current by NOTA-HsTX1[R14A] fitted to a Hill equation ( $n = 3$  cells per concentration).

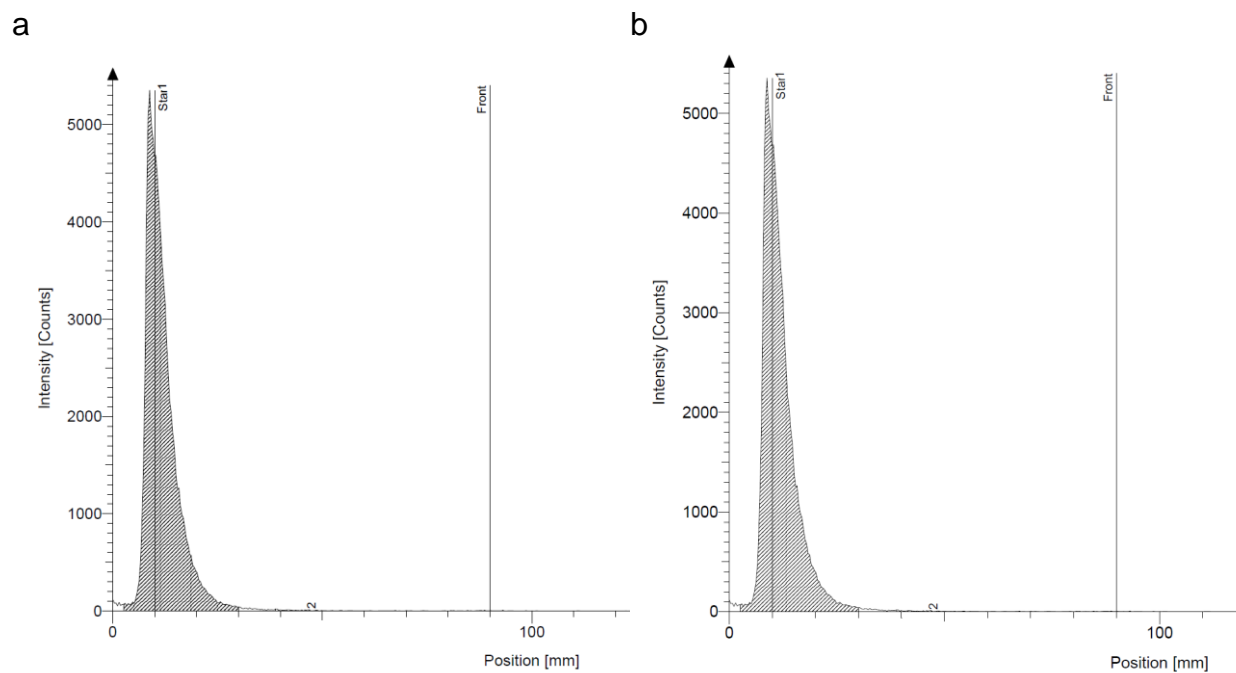

**Figure S3.** Radio-TLC chromatograms of  $[^{64}\text{Cu}]\text{Cu-NOTA-HsTX1[R14A]}$  conjugate ( $R_f = 0$ ), RCY of conjugate > 99%; (a) iTLC-SA, 0.1 M aq. EDTA solution, (b) iTLC-SA, 0.1% aq. HCOOH.

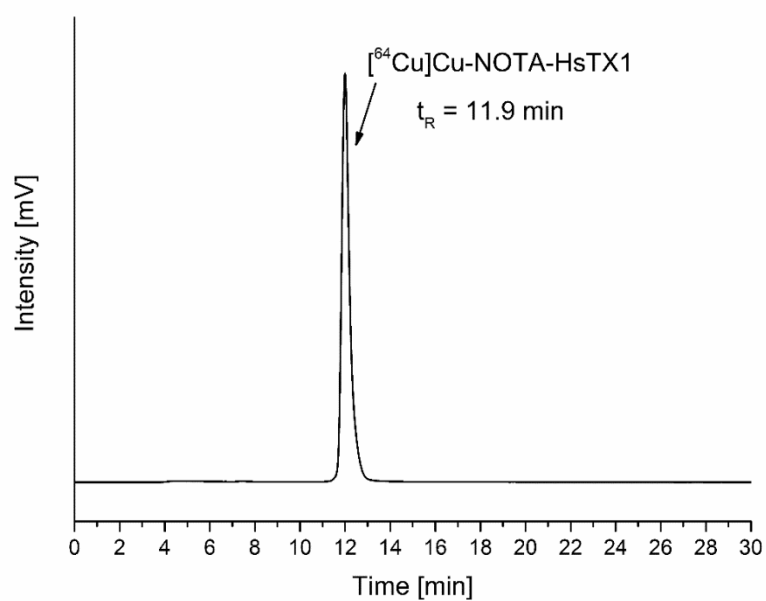

**Figure S4.** Radio-HPLC chromatogram of [ $^{64}\text{Cu}$ ]Cu-NOTA-HsTX1[R14A], RCP > 99% (free  $^{64}\text{Cu}^{\text{II}}$ ,  $t_{\text{R}} \sim 4$  min); Aqua C18 column (Phenomenex, 4.6 mm  $\times$  250 mm, 5  $\mu\text{m}$ , 125  $\text{\AA}$ ) using a gradient eluent of  $\text{H}_2\text{O} + 0.05\%$  TFA (A) and  $\text{CH}_3\text{CN} + 0.05\%$  TFA (B); in 20 min 60% of B, in 10 min 95% B, 1 mL/min.

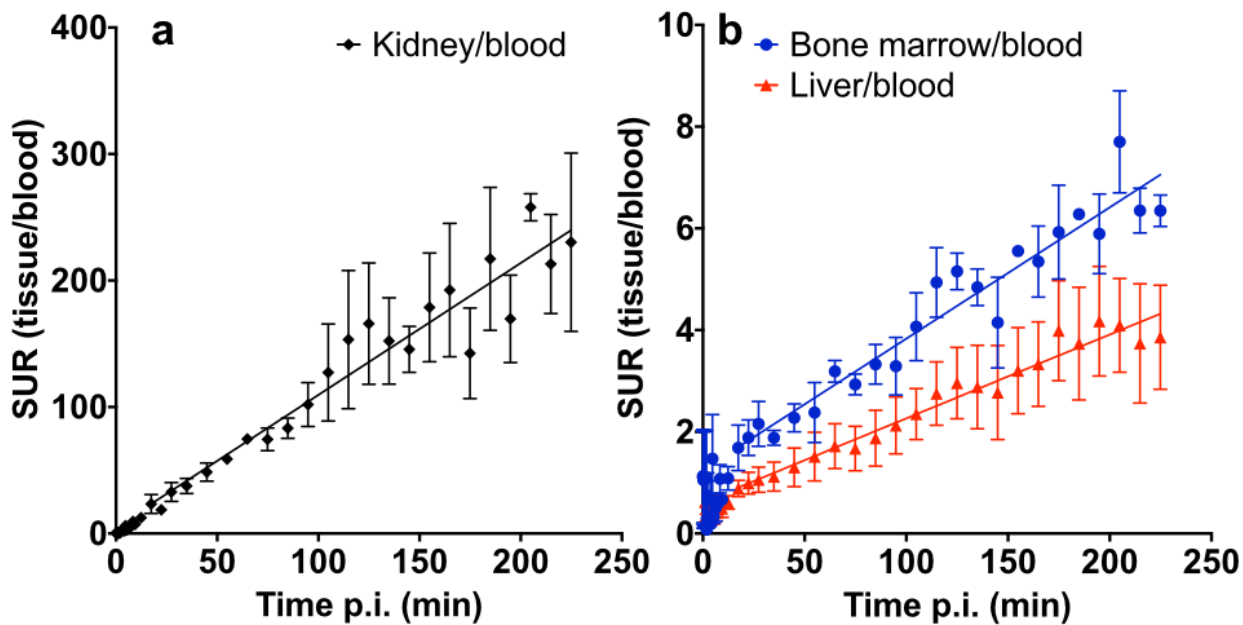

**Figure S5.** Standard uptake ratios (tissue to blood ratios) of (a) kidney, (b) bone marrow and liver; calculated from the PET studies after i.v. injection (mean  $\pm$  SEM, n = 3).

**Table S1.** Biodistribution of [<sup>64</sup>Cu]Cu-NOTA-HsTX1[R14A] in male Wistar rats after single intravenous and subcutaneous injection. Activity amounts are expressed as percent of injected dose (%ID) as mean ± SD (number of animals).

| %ID<br>Time p.i. (min) | i.v.            |                 |                 |                 |                 | s.c.               |                   |                 |                 |  |
|------------------------|-----------------|-----------------|-----------------|-----------------|-----------------|--------------------|-------------------|-----------------|-----------------|--|
|                        | 5               | 60              | 240             | 1440            | 2880            | 60                 | 240               | 1440            | 2880            |  |
| Brain                  | 0.05 ± 0.00 (4) | 0.05 ± 0.03 (8) | 0.05 ± 0.01 (4) | 0.08 ± 0.03 (8) | 0.10 ± 0.00 (4) | 0.06 ± 0.01 (4)    | 0.05 ± 0.00 (4)   | 0.10 ± 0.00 (4) | 0.09 ± 0.00 (4) |  |
| Pancreas               | 0.11 ± 0.03 (4) | 0.06 ± 0.02 (8) | 0.08 ± 0.00 (4) | 0.20 ± 0.16 (8) | 0.08 ± 0.01 (4) | 0.11 ± 0.03 (4) *  | 0.08 ± 0.01 (4)   | 0.15 ± 0.01 (4) | 0.07 ± 0.01 (4) |  |
| Spleen                 | 0.83 ± 0.12 (4) | 0.79 ± 0.11 (8) | 0.67 ± 0.06 (4) | 0.18 ± 0.04 (8) | 0.16 ± 0.01 (4) | 1.08 ± 0.03 (4) ** | 0.75 ± 0.03 (4)   | 0.15 ± 0.00 (4) | 0.15 ± 0.01 (4) |  |
| Adrenals               | 0.03 ± 0.00 (4) | 0.01 ± 0.00 (8) | 0.01 ± 0.00 (4) | 0.02 ± 0.00 (8) | 0.02 ± 0.00 (4) | 0.01 ± 0.00 (4)    | 0.01 ± 0.00 (4)   | 0.02 ± 0.00 (4) | 0.02 ± 0.01 (4) |  |
| Kidneys                | 23.9 ± 3.93 (4) | 61.6 ± 4.21 (8) | 63.1 ± 0.97 (4) | 14.2 ± 2.04 (8) | 6.19 ± 0.49 (4) | 53.3 ± 4.90 (4) *  | 62.5 ± 2.36 (4)   | 13.6 ± 1.10 (4) | 4.95 ± 0.49 (4) |  |
| Heart                  | 0.33 ± 0.04 (4) | 0.21 ± 0.06 (8) | 0.19 ± 0.03 (4) | 0.23 ± 0.02 (8) | 0.27 ± 0.04 (4) | 0.32 ± 0.02 (4) *  | 0.18 ± 0.03 (4)   | 0.23 ± 0.01 (4) | 0.22 ± 0.01 (4) |  |
| Lung                   | 1.44 ± 0.18 (4) | 1.24 ± 0.30 (8) | 0.92 ± 0.12 (4) | 0.50 ± 0.05 (8) | 0.46 ± 0.06 (4) | 1.64 ± 0.24 (4)    | 1.04 ± 0.08 (4)   | 0.49 ± 0.02 (4) | 0.33 ± 0.01 (4) |  |
| Thymus                 | 0.37 ± 0.07 (4) | 0.37 ± 0.08 (8) | 0.37 ± 0.04 (4) | 0.21 ± 0.03 (8) | 0.17 ± 0.02 (4) | 0.46 ± 0.01 (4)    | 0.43 ± 0.04 (4)   | 0.22 ± 0.01 (4) | 0.16 ± 0.02 (4) |  |
| Thyroid                | 0.07 ± 0.00 (4) | 0.11 ± 0.02 (8) | 0.12 ± 0.01 (4) | 0.08 ± 0.01 (8) | 0.07 ± 0.02 (4) | 0.13 ± 0.02 (4)    | 0.11 ± 0.02 (4)   | 0.09 ± 0.05 (4) | 0.03 ± 0.02 (4) |  |
| Harderian gl.          | 0.10 ± 0.02 (4) | 0.04 ± 0.00 (8) | 0.03 ± 0.00 (4) | 0.08 ± 0.01 (8) | 0.07 ± 0.00 (4) | 0.04 ± 0.00 (4)    | 0.03 ± 0.00 (4)   | 0.08 ± 0.01 (4) | 0.06 ± 0.01 (4) |  |
| Liver                  | 4.60 ± 2.22 (4) | 5.43 ± 1.44 (8) | 7.01 ± 1.47 (4) | 14.8 ± 2.42 (8) | 8.35 ± 0.95 (4) | 4.44 ± 0.74 (4)    | 6.79 ± 2.27 (4)   | 11.1 ± 1.82 (4) | 7.85 ± 0.49 (4) |  |
| Femur                  | 1.32 ± 0.89 (4) | 0.80 ± 0.21 (8) | 0.55 ± 0.03 (4) | 0.30 ± 0.06 (8) | 0.23 ± 0.01 (4) | 0.82 ± 0.04 (4)    | 0.64 ± 0.02 (4) * | 0.34 ± 0.01 (4) | 0.19 ± 0.02 (4) |  |
| Testes                 | 0.27 ± 0.05 (4) | 0.23 ± 0.02 (8) | 0.21 ± 0.01 (4) | 1.05 ± 0.13 (8) | 0.76 ± 0.02 (4) | 0.21 ± 0.01 (4)    | 0.20 ± 0.03 (4)   | 0.92 ± 0.06 (4) | 0.63 ± 0.06 (4) |  |
| Intestine              | 3.59 ± 2.40 (4) | 5.30 ± 2.31 (8) | 4.61 ± 1.84 (4) | 16.5 ± 2.32 (8) | 8.27 ± 1.01 (4) | 7.85 ± 3.82 (4)    | 4.65 ± 1.73 (4)   | 19.3 ± 1.35 (4) | 8.16 ± 1.02 (4) |  |
| Stomach                | 0.67 ± 0.09 (4) | 1.28 ± 1.20 (8) | 1.52 ± 1.06 (4) | 1.56 ± 1.04 (8) | 1.46 ± 0.37 (4) | 1.14 ± 0.45 (4)    | 0.60 ± 0.03 (4)   | 0.82 ± 0.07 (4) | 1.72 ± 1.02 (4) |  |
| Carcass                | 63.4 ± 6.19 (4) | 28.1 ± 1.55 (8) | 20.1 ± 1.68 (4) | 28.4 ± 3.49 (8) | 21.6 ± 1.04 (4) | 32.9 ± 2.62 (4) ** | 20.1 ± 1.28 (4)   | 28.5 ± 1.49 (4) | 19.7 ± 2.74 (4) |  |

**Table S2.** Biodistribution of [<sup>64</sup>Cu]Cu-NOTA-HsTX1[R14A] in male Wistar rats after single intravenous and subcutaneous injection. Activity concentrations in the tissues are expressed as activity per g tissue normalized to the injected activity and body weight in g, standard uptake value (SUV, g/g) as mean ± SD (number of animals)..

| SUV<br>Time p.i. (min) | i.v.            |                 |                 |                 |                 | s.c.               |                   |                 |                 |
|------------------------|-----------------|-----------------|-----------------|-----------------|-----------------|--------------------|-------------------|-----------------|-----------------|
|                        | 5               | 60              | 240             | 1440            | 2880            | 60                 | 240               | 1440            | 2880            |
| Blood                  | 1.09 ± 0.62 (4) | 0.70 ± 0.23 (8) | 0.51 ± 0.02 (4) | 0.71 ± 0.16 (8) | 0.38 ± 0.02 (4) | 0.65 ± 0.11 (4)    | 0.47 ± 0.21 (4)   | 0.44 ± 0.04 (4) | 0.30 ± 0.01 (4) |
| Brain                  | 0.07 ± 0.00 (4) | 0.05 ± 0.01 (8) | 0.03 ± 0.00 (4) | 0.08 ± 0.01 (8) | 0.07 ± 0.00 (4) | 0.04 ± 0.00 (4)    | 0.03 ± 0.00 (4)   | 0.06 ± 0.00 (4) | 0.07 ± 0.00 (4) |
| Pancreas               | 0.64 ± 0.09 (4) | 0.30 ± 0.04 (8) | 0.24 ± 0.01 (4) | 0.62 ± 0.16 (8) | 0.32 ± 0.01 (4) | 0.29 ± 0.03 (4)    | 0.25 ± 0.00 (4)   | 0.48 ± 0.02 (4) | 0.28 ± 0.02 (4) |
| Spleen                 | 4.06 ± 0.60 (4) | 3.42 ± 0.42 (8) | 2.40 ± 0.10 (4) | 0.83 ± 0.26 (8) | 0.56 ± 0.05 (4) | 4.00 ± 0.21 (4) *  | 2.84 ± 0.25 (4) * | 0.59 ± 0.03 (4) | 0.47 ± 0.04 (4) |
| Adrenals               | 1.26 ± 0.48 (4) | 0.65 ± 0.37 (8) | 0.39 ± 0.05 (4) | 0.86 ± 0.11 (8) | 0.71 ± 0.04 (4) | 0.40 ± 0.08 (4)    | 0.40 ± 0.02 (4)   | 0.73 ± 0.10 (4) | 0.55 ± 0.33 (4) |
| Kidneys                | 35.1 ± 6.82 (4) | 78.4 ± 13.6 (8) | 68.4 ± 4.28 (4) | 18.0 ± 5.32 (8) | 6.37 ± 0.59 (4) | 58.1 ± 5.55 (4) *  | 70.2 ± 4.14 (4)   | 14.4 ± 1.32 (4) | 5.98 ± 1.08 (4) |
| WAT                    | 0.28 ± 0.06 (4) | 0.19 ± 0.07 (8) | 0.15 ± 0.00 (4) | 0.19 ± 0.09 (8) | 0.34 ± 0.08 (4) | 0.25 ± 0.05 (4)    | 0.17 ± 0.05 (4)   | 0.22 ± 0.01 (4) | 0.17 ± 0.08 (4) |
| Muscle                 | 0.43 ± 0.03 (4) | 0.17 ± 0.06 (8) | 0.07 ± 0.00 (4) | 0.18 ± 0.02 (8) | 0.19 ± 0.01 (4) | 0.15 ± 0.02 (4)    | 0.08 ± 0.01 (4)   | 0.19 ± 0.01 (4) | 0.16 ± 0.00 (4) |
| Heart                  | 1.04 ± 0.14 (4) | 0.53 ± 0.08 (8) | 0.40 ± 0.07 (4) | 0.62 ± 0.07 (8) | 0.64 ± 0.06 (4) | 0.70 ± 0.03 (4) ** | 0.41 ± 0.06 (4)   | 0.53 ± 0.02 (4) | 0.57 ± 0.04 (4) |
| Lung                   | 2.87 ± 0.32 (4) | 1.98 ± 0.17 (8) | 1.24 ± 0.10 (4) | 0.78 ± 0.13 (8) | 0.55 ± 0.03 (4) | 2.10 ± 0.33 (4)    | 1.32 ± 0.12 (4)   | 0.63 ± 0.02 (4) | 0.47 ± 0.01 (4) |
| Thymus                 | 1.51 ± 0.08 (4) | 1.33 ± 0.19 (8) | 1.07 ± 0.02 (4) | 0.74 ± 0.15 (8) | 0.53 ± 0.02 (4) | 1.15 ± 0.03 (4)    | 1.07 ± 0.11 (4)   | 0.63 ± 0.05 (4) | 0.46 ± 0.05 (4) |
| Harderian gl.          | 0.82 ± 0.12 (4) | 0.30 ± 0.05 (8) | 0.23 ± 0.01 (4) | 0.56 ± 0.10 (8) | 0.48 ± 0.05 (4) | 0.32 ± 0.01 (4)    | 0.21 ± 0.01 (4)   | 0.46 ± 0.01 (4) | 0.44 ± 0.02 (4) |
| Liver                  | 1.02 ± 0.53 (4) | 1.24 ± 0.31 (8) | 1.78 ± 0.45 (4) | 2.93 ± 0.78 (8) | 1.45 ± 0.13 (4) | 1.13 ± 0.23 (4)    | 1.75 ± 0.63 (4)   | 2.23 ± 0.32 (4) | 1.40 ± 0.08 (4) |
| Femur                  | 3.04 ± 2.13 (4) | 1.58 ± 0.58 (8) | 0.87 ± 0.04 (4) | 0.54 ± 0.06 (8) | 0.39 ± 0.02 (4) | 1.25 ± 0.07 (4)    | 0.92 ± 0.08 (4)   | 0.47 ± 0.02 (4) | 0.34 ± 0.02 (4) |
| Testes                 | 0.24 ± 0.03 (4) | 0.16 ± 0.01 (8) | 0.13 ± 0.01 (4) | 0.87 ± 0.34 (8) | 0.50 ± 0.02 (4) | 0.15 ± 0.01 (4)    | 0.12 ± 0.01 (4)   | 0.54 ± 0.02 (4) | 0.44 ± 0.01 (4) |



**Table S3.** Pharmacokinetic parameters calculated from the biodistribution data.

| Parameter           |           | Blood i.v.  | Blood s.c.  | Liver i.v.  | Liver s.c.  | Kidney i.v. | Kidney s.c. |
|---------------------|-----------|-------------|-------------|-------------|-------------|-------------|-------------|
| animals             | n         | 8           | 4           | 8           | 4           | 8           | 4           |
| AUC*                | (SUV x h) | 28.3 ± 2,1  | 19,9 ± 2,6  | 92,7 ± 11,0 | 87,8 ± 9,5  | 1417 ± 102  | 1285 ± 57   |
| t <sub>1/2</sub> ** | (h)       | 49,5        | 46,4        | 39,5        | 35,9        | 14,7        | 18,9        |
| Peak time           | (h)       | 1           | 1           | 24          | 24          | 1           | 4           |
| Cmax                | (SUV)     | 0,83 ± 0,26 | 0,65 ± 0,11 | 2,50 ± 0,57 | 2,23 ± 0,32 | 74,8 ± 12,8 | 70,2 ± 4,1  |

\* AUC was calculated between 1 and 48 h

\*\* t<sub>1/2</sub> was calculated from 24 to 48 h.
